# Supplementary material
Source: PubMed Central journal article supplement (PMC6411837)
Supplement: gky1274_supplemental_files.pdf [file gky1274_supplemental_files.pdf]

**SUPPLEMENTARY MATERIAL FOR:**

**A network of eIF2 $\beta$  interactions with eIF1 and Met-tRNA<sub>i</sub> promotes accurate  
start codon selection by the translation preinitiation complex**

Anil Thakur, Laura Marler, and Alan G. Hinnebusch

**Table S1. Plasmids used in this study.**

| Plasmid               | Description                                                                     | Parent Plasmid | Source or Reference |
|-----------------------|---------------------------------------------------------------------------------|----------------|---------------------|
| YCplac111             | sc <i>LEU2</i> cloning vector                                                   |                | (1)                 |
| p1200                 | sc <i>URA3 SUI1</i> in YCp50                                                    |                | (2)                 |
| YCplac112             | hc TRP cloning Vector                                                           |                | (1)                 |
| pJCB101               | sc <i>LEU2 SUI1</i> in YCplac111                                                |                | (3)                 |
| YEpl24                | hc <i>URA3</i> cloning vector                                                   |                | (4)                 |
| ATP114                | sc <i>LEU2 sui1-Q31A</i> in YCplac111                                           | pJCB101        | This study          |
| ATP115                | sc <i>LEU2 sui1-Q31K</i> in YCplac111                                           | pJCB101        | This study          |
| ATP116                | sc <i>LEU2 sui1-Q31E</i> in YCplac111                                           | pJCB101        | This study          |
| ATP117                | sc <i>LEU2 sui1-F108A</i> in YCplac111                                          | pJCB101        | This study          |
| ATP118                | sc <i>LEU2 sui1-F108D</i> in YCplac111                                          | pJCB101        | This study          |
| ATP119                | sc <i>LEU2 sui1-F108R</i> in YCplac111                                          | pJCB101        | This study          |
| ATP124                | sc <i>LEU2 sui1-Q31A-F108A</i> in YCplac111                                     | pJCB101        | This study          |
| p367                  | sc <i>URA3 HIS4(ATG)-lacZ</i>                                                   |                | (5)                 |
| p391                  | sc <i>URA3 HIS4(TTG)-lacZ</i>                                                   |                | (5)                 |
| p180                  | sc <i>URA3 GCN4-lacZ</i> in YCp50                                               |                | (6)                 |
| pPMB24                | sc <i>URA3 SUI1-lacZ</i>                                                        |                | (3)                 |
| pPMB25                | sc <i>URA3 SUI1<sub>opt</sub>-lacZ</i>                                          |                | (3)                 |
| pC3502                | sc <i>URA3</i> <sup>-3AAA<sup>-1</sup></sup> el.uORF1 <i>GCN4-lacZ</i> in YCp50 |                | (7)                 |
| pC4466                | sc <i>URA3</i> <sup>-3UAA<sup>-1</sup></sup> el.uORF1 <i>GCN4-lacZ</i> in YCp50 |                | (7)                 |
| pC3503                | sc <i>URA3</i> <sup>-3UUU<sup>-1</sup></sup> el.uORF1 <i>GCN4-lacZ</i> in YCp50 |                | (7)                 |
| pC3505                | sc <i>URA3</i> el.uORF1-less <i>GCN4-lacZ</i> in YCp50                          |                | (7)                 |
| p1780-IMT             | hc <i>URA3 SUI2, SUI3, GCD11, IMT4</i>                                          | YEpl24         | (8)                 |
| p4385                 | hc <i>TRP1- SUI2, SUI3, GCD11, IMT4</i>                                         | p1780-IMT      | Christie Fekete     |
| p4280/YCpSUI3-S264Y-W | sc <i>TRP1 SUI3-S264Y</i>                                                       | YCplac22       | (9)                 |
| p4281/YCpTIF5-G31R-W  | sc <i>TRP1 TIF5-G31R</i>                                                        | YCplac22       | (9)                 |
| pTYB2-eIF1            | <i>SUI1</i> in pTYB2                                                            | pTYB2          | (10),(10)           |
| pPMB97                | <i>sui1-K60E</i> in pTYB2                                                       | pTYB2-eIF1     | (11)                |
| ATP172                | <i>sui1-Q31E</i> in pTYB2                                                       | pTYB2-eIF1     | This study          |
| ATP173                | <i>sui1-F108D</i> in pTYB2                                                      | pTYB2-eIF1     | This study          |
| ATP174                | <i>sui1-F108R</i> in pTYB2                                                      | pTYB2-eIF1     | This study          |
| ATP175                | <i>sui1-Q31A-F108A</i> in pTYB2                                                 | pTYB2-eIF1     | This study          |
| p921                  | sc <i>URA3 SUI3</i>                                                             | pRS316         | (12)                |
| p920                  | sc <i>LEU2 SUI3</i>                                                             | pRS315         | Thomas Dever        |
| LMP24                 | sc <i>LEU2 SUI3-E198A</i>                                                       | p920           | This study          |
| LMP27                 | sc <i>LEU2 SUI3-F217A</i>                                                       | p920           | This study          |
| LMP29                 | sc <i>LEU2 SUI3-F217A/Q221A</i>                                                 | p920           | This study          |

| Plasmid | Description                                          | Parent Plasmid | Source or Reference |
|---------|------------------------------------------------------|----------------|---------------------|
| LMP32   | <i>sc LEU2 SUI3-K170A</i>                            | p920           | This study          |
| LMP33   | <i>sc LEU2 SUI3-K170A/S202A</i>                      | p920           | This study          |
| LMP37   | <i>sc LEU2 SUI3-K214A</i>                            | p920           | This study          |
| LMP38   | <i>sc LEU2 SUI3-S202A/K214A</i>                      | p920           | This study          |
| LMP94   | <i>sc LEU2 SUI3-E189A</i>                            | p920           | This study          |
| LMP95   | <i>sc LEU2 SUI3-E189R</i>                            | p920           | This study          |
| LMP96   | <i>sc LEU2 SUI3-Q193A</i>                            | p920           | This study          |
| LMP97   | <i>sc LEU2 SUI3-Q193R</i>                            | p920           | This study          |
| LMP98   | <i>sc LEU2 SUI3-E189A/Q193A</i>                      | p920           | This study          |
| LMP99   | <i>sc LEU2 SUI3-E189R/Q193R</i>                      | p920           | This study          |
| pAV1089 | <i>hc URA3(6x)His-GCD11, SUI2, SUI3</i>              | YEp24          | (13)                |
| pAV1726 | <i>hc LEU2 (6x)His-GCD11, SUI2, SUI3</i>             | pRS425         | (14)                |
| LMP91   | <i>hc LEU2 (6x)His-GCD11, SUI2, SUI3-F217A/Q221A</i> | pAV1726        | This study          |
| LMP92   | <i>hc LEU2 (6x)His-GCD11, SUI2, SUI3-S202A/K214A</i> | pAV1726        | This study          |
| LMP101  | <i>hc LEU2 (6x)His-GCD11, SUI2, SUI3-E189R</i>       | pAV1726        | This study          |

**Table S2. Yeast strains used in this study.**

| Strain         | Genotype                                                                                                | Source     |
|----------------|---------------------------------------------------------------------------------------------------------|------------|
| JCY03          | <i>MATa ura3-52 leu2-3 leu2-112 trp1Δ-63 his4-301(ACG) sui1Δ::hisG p1200 (sc URA3 SUI1)</i>             | (15)       |
| ATY100 (PMY30) | <i>MATa ura3-52 leu2-3 leu2-112 trp1Δ-63 his4-301(ACG) sui1Δ::hisG pJCB101 (sc LEU2 SUI1)</i>           | (3)        |
| ATY122         | <i>MATa ura3-52 leu2-3 leu2-112 trp1Δ-63 his4-301(ACG) sui1Δ::hisG ATP114 (sc LEU2 sui1-Q31A)</i>       | This study |
| ATY123         | <i>MATa ura3-52 leu2-3 leu2-112 trp1Δ-63 his4-301(ACG) sui1Δ::hisG ATP115 (sc LEU2 sui1-Q31K)</i>       | This study |
| ATY124         | <i>MATa ura3-52 leu2-3 leu2-112 trp1Δ-63 his4-301(ACG) sui1Δ::hisG ATP116 (sc LEU2 sui1-Q31E)</i>       | This study |
| ATY125         | <i>MATa ura3-52 leu2-3 leu2-112 trp1Δ-63 his4-301(ACG) sui1Δ::hisG ATP117 (sc LEU2 sui1-F108A)</i>      | This study |
| ATY126         | <i>MATa ura3-52 leu2-3 leu2-112 trp1Δ-63 his4-301(ACG) sui1Δ::hisG ATP118 (sc LEU2 sui1-F108D)</i>      | This study |
| ATY127         | <i>MATa ura3-52 leu2-3 leu2-112 trp1Δ-63 his4-301(ACG) sui1Δ::hisG ATP119 (sc LEU2 sui1-F108R)</i>      | This study |
| ATY128         | <i>MATa ura3-52 leu2-3 leu2-112 trp1Δ-63 his4-301(ACG) sui1Δ::hisG ATP124 (sc LEU2 sui1-Q31A-F108A)</i> | This study |
| KAY18          | <i>MATα leu2-3 leu2-112 ura3-53 ino1 sui3Δ gcn2Δ p921(SUI3, URA3)</i>                                   | (8)        |
| LMY103         | <i>MATα leu2-3 leu2-112 ura3-53 ino1 sui3Δ gcn2Δ LMP24(SUI3-E198A, LEU2)</i>                            | This study |
| LMY106         | <i>MATα leu2-3 leu2-112 ura3-53 ino1 sui3Δ gcn2Δ LMP27(SUI3-F217A, LEU2)</i>                            | This study |
| LMY108         | <i>MATα leu2-3 leu2-112 ura3-53 ino1 sui3Δ gcn2Δ LMP29(SUI3-F217A/Q221A, LEU2)</i>                      | This study |
| LMY111         | <i>MATα leu2-3 leu2-112 ura3-53 ino1 sui3Δ gcn2Δ LMP32(SUI3-K170A, LEU2)</i>                            | This study |
| LMY112         | <i>MATα leu2-3 leu2-112 ura3-53 ino1 sui3Δ gcn2Δ LMP33(SUI3-K170A/S202A, LEU2)</i>                      | This study |
| LMY116         | <i>MATα leu2-3 leu2-112 ura3-53 ino1 sui3Δ gcn2Δ LMP37(SUI3-K214A, LEU2)</i>                            | This study |
| LMY117         | <i>MATα leu2-3 leu2-112 ura3-53 ino1 sui3Δ gcn2Δ LMP38(SUI3-S202A/K214A, LEU2)</i>                      | This study |
| LMY130         | <i>MATα leu2-3 leu2-112 ura3-53 ino1 sui3Δ gcn2Δ LMP94(SUI3-E189A, LEU2)</i>                            | This study |
| LMY131         | <i>MATα leu2-3 leu2-112 ura3-53 ino1 sui3Δ gcn2Δ LMP95(SUI3-E189R, LEU2)</i>                            | This study |
| LMY132         | <i>MATα leu2-3 leu2-112 ura3-53 ino1 sui3Δ gcn2Δ LMP96(SUI3-Q193A, LEU2)</i>                            | This study |
| LMY133         | <i>MATα leu2-3 leu2-112 ura3-53 ino1 sui3Δ gcn2Δ LMP97(SUI3-Q193R, LEU2)</i>                            | This study |

| Strain | Genotype                                                                                                                                                                                                                                                 | Source     |
|--------|----------------------------------------------------------------------------------------------------------------------------------------------------------------------------------------------------------------------------------------------------------|------------|
| LMY134 | <i>MAT<math>\alpha</math> leu2-3 leu2-112 ura3-53 ino1 sui3<math>\Delta</math> gcn2<math>\Delta</math> LMP98(SUI3-E189A/Q193A, LEU2)</i>                                                                                                                 | This study |
| LMY135 | <i>MAT<math>\alpha</math> leu2-3 leu2-112 ura3-53 ino1 sui3<math>\Delta</math> gcn2<math>\Delta</math> LMP99(SUI3-E189R/Q193R, LEU2)</i>                                                                                                                 | This study |
| LMY142 | <i>MAT<math>\alpha</math> leu2-3 leu2-112 ura3-53 ino1 sui3<math>\Delta</math> gcn2<math>\Delta</math> p920(SUI3, LEU2)</i>                                                                                                                              | This study |
| H3840  | <i>MAT<math>\alpha</math> leu2-3 leu2-112 ura3-52 ino1 sui2<math>\Delta</math> gcn2<math>\Delta</math> pep4::<i>leu2</i>::<i>NatMX4 sui3</i>::<i>KANMX4</i> &lt;<i>HIS4-lacZ, ura3-52</i>&gt; pAV1089(<i>SUI2, SUI3, [6x]-GCD11, URA3</i>)</i>           | (16)       |
| LMY128 | <i>MAT<math>\alpha</math> leu2-3 leu2-112 ura3-52 ino1 sui2<math>\Delta</math> gcn2<math>\Delta</math> pep4::<i>leu2</i>::<i>NatMX4 sui3</i>::<i>KANMX4</i> &lt;<i>HIS4-lacZ, ura3-52</i>&gt; LMP92(<i>SUI2, SUI3-S202A/K214A, [6x]-GCD11, URA3</i>)</i> | This study |
| LMY129 | <i>MAT<math>\alpha</math> leu2-3 leu2-112 ura3-52 ino1 sui2<math>\Delta</math> gcn2<math>\Delta</math> pep4::<i>leu2</i>::<i>NatMX4 sui3</i>::<i>KANMX4</i> &lt;<i>HIS4-lacZ, ura3-52</i>&gt; LMP91(<i>SUI2, SUI3-F217A/Q221A, [6x]-GCD11, URA3</i>)</i> | This study |
| LMY137 | <i>MAT<math>\alpha</math> leu2-3 leu2-112 ura3-52 ino1 sui2<math>\Delta</math> gcn2<math>\Delta</math> pep4::<i>leu2</i>::<i>NatMX4 sui3</i>::<i>KANMX4</i> &lt;<i>HIS4-lacZ, ura3-52</i>&gt; LMP101(<i>SUI2, SUI3-E189R, [6x]-GCD11, URA3</i>)</i>      | This study |

**Table S3. Oligonucleotide primers used in this study.**

| <b>SUBSTITUTION</b>                                    | <b>SEQUENCE 5' -3'</b>                                                       |
|--------------------------------------------------------|------------------------------------------------------------------------------|
| <b>eIF1-Q31A FOR*</b>                                  | CTATATTCATATTCGTATCGCACAGAGAAATGGTAGAAAAAC<br>TTTAACTAC                      |
| <b>eIF1-Q31A REV*</b>                                  | GTAGTTAAAGTTTTTCTACCATTTCTCTGTGCGATACGAATAT<br>GAATATAG                      |
| <b>eIF1-Q31KFOR</b>                                    | CTATATTCATATTCGTATCAAACAGAGAAATGGTAGAAAAAC<br>TTTAACTACGG                    |
| <b>eIF1-Q31K REV</b>                                   | CCGTAGTTAAAGTTTTTCTACCATTTCTCTGTTTGATACGAAT<br>ATGAATATAG                    |
| <b>eIF1-Q31E FOR</b>                                   | CAAACATATTCATATTCGTATCGAACAGAGAAATGGTAGAA<br>AAACTTTAAC                      |
| <b>eIF1-Q31E REV</b>                                   | GTAAAGTTTTTCTACCATTTCTCTGTTCGATACGAATATGAA<br>TATAGTTTG                      |
| <b>eIF1-F108A FOR</b>                                  | GAAGAACATTAATAATTCATGGGGCTTAAGTTCAAGGCTTACG<br>CCGAGTC                       |
| <b>eIF1-F108A REV</b>                                  | GACTCGGCGTAAGCCTTGAACCTAAGCCCCATGAATTTTAAT<br>GTTCTTC                        |
| <b>eIF1-F108D FOR</b>                                  | GAAGAACATTAATAATTCATGGGGATTAAGTTCAAGGCTTACG<br>CCGAGTC                       |
| <b>eIF1-F108D<br/>REV</b>                              | GACTCGGCGTAAGCCTTGAACCTAATCCCCATGAATTTTAAT<br>GTTCTTC                        |
| <b>eIF1-F108R FOR</b>                                  | GAAGAACATTAATAATTCATGGGCGTTAAGTTCAAGGCTTACG<br>CCGAGTC                       |
| <b>eIF1-F108R REV</b>                                  | GACTCGGCGTAAGCCTTGAACCTAACGCCCATGAATTTTAAT<br>GTTCTTC                        |
| <b>eIF2<math>\beta</math>-E198A<br/>FOR</b>            | TTCAATATCTCTTCGCAGCATTAGGTACGTCCGGTTC                                        |
| <b>eIF2<math>\beta</math>-E198A<br/>REV</b>            | GAACCGGACGTACCTAATGCTGCGAAGAGATATTGAA                                        |
| <b>eIF2<math>\beta</math>-F217A<br/>FOR</b>            | GAAAAGATTAGTCATTAAGGGTAAGGCTCAATCCAAACAAA<br>TGGAGAATGTC                     |
| <b>eIF2<math>\beta</math>-F217A<br/>REV</b>            | GACATTCTCCATTTGTTTGGATTGAGCCTTACCCTTAATGACT<br>AATCTTTTC                     |
| <b>eIF2<math>\beta</math>-<br/>F217A/Q221A<br/>FOR</b> | GTCAGAAAAGATTAGTCATTAAGGGTAAGGCTCAATCCAAA<br>GCAATGGAGAATGTCTTAAGAAGATACATTT |
| <b>eIF2<math>\beta</math>-<br/>F217A/Q221A<br/>REV</b> | AAATGTATCTTCTTAAGACATTCTCCATTGCTTTGGATTGAGC<br>CTTACCCTTAATGACTAATCTTTTCTGAC |

| <b>SUBSTITUTION</b>                                    | <b>SEQUENCE 5' -3'</b>                                          |
|--------------------------------------------------------|-----------------------------------------------------------------|
| <b>eIF2<math>\beta</math>-K170A<br/>FOR</b>            | CTCCTGTTTGTGGCGTGATGGTGCGAAGACTATTTTCTCGAA<br>TATCC             |
| <b>eIF2<math>\beta</math>-K170A<br/>REV</b>            | GGATATTCGAGAAAATAGTCTTCGCACCATCACGCAAACAA<br>ACAGGAG            |
| <b>eIF2<math>\beta</math>-S202A<br/>FOR</b>            | CGCAGAATTAGGTACGGCCGGTTCTGTTGACGG                               |
| <b>eIF2<math>\beta</math>-S202A<br/>REV</b>            | CCGTCAACAGAACCGGCCGTACCTAATTCTGCG                               |
| <b>eIF2<math>\beta</math>-K214A<br/>FOR</b>            | TTCTGTTGACGGTCAGAAAAGATTAGTCATTGCGGGTAAGTT<br>TCAATCC           |
| <b>eIF2<math>\beta</math>-K214A<br/>REV</b>            | GGATTGAAACTTACCCGCAATGACTAATCTTTTCTGACCGTC<br>AACAGAA           |
| <b>eIF2<math>\beta</math>-E189A<br/>FOR</b>            | CGAAAAATTGCATAGATCTCCGGCACATTTGATTCAATATCT<br>CTTCG             |
| <b>eIF2<math>\beta</math>-E189A<br/>REV</b>            | CGAAGAGATATTGAATCAAATGTGCCGGAGATCTATGCAATT<br>TTTCG             |
| <b>eIF2<math>\beta</math>-E189R<br/>FOR</b>            | GCCGAAAAATTGCATAGATCTCCGAGACATTTGATTCAATAT<br>CTCTTCGC          |
| <b>eIF2<math>\beta</math>-E189R<br/>REV</b>            | GCGAAGAGATATTGAATCAAATGTCTCGGAGATCTATGCAAT<br>TTTTCGGC          |
| <b>eIF2<math>\beta</math>-Q193A<br/>FOR</b>            | CATAGATCTCCGGAACATTTGATTGCATATCTCTTCGCAGAA<br>TTAGGTA           |
| <b>eIF2<math>\beta</math>-Q193A<br/>REV</b>            | TACCTAATTCTGCGAAGAGATATGCAATCAAATGTTCCGGAG<br>ATCTATG           |
| <b>eIF2<math>\beta</math>-Q193R<br/>FOR</b>            | GATCTCCGGAACATTTGATTGCATATCTCTTCGCAGAATTAG<br>G                 |
| <b>eIF2<math>\beta</math>-Q193R<br/>REV</b>            | CCTAATTCTGCGAAGAGATATCGAATCAAATGTTCCGGAGAT<br>C                 |
| <b>eIF2<math>\beta</math>-<br/>E189A/Q193A<br/>FOR</b> | CGAAAAATTGCATAGATCTCCGGCACATTTGATTGCATATCT<br>CTTCGCAGAATTAGGTA |

**SUBSTITUTION****SEQUENCE 5' -3'**

|                                                        |                                                                  |
|--------------------------------------------------------|------------------------------------------------------------------|
| <b>eIF2<math>\beta</math>-<br/>E189A/Q193A<br/>REV</b> | TACCTAATTCTGCGAAGAGATATGCAATCAAATGTGCCGGAG<br>ATCTATGCAATTTTTTCG |
| <b>eIF2<math>\beta</math>-<br/>E189R/Q193R<br/>FOR</b> | CGAAAAATTGCATAGATCTCCGAGACATTTGATTTCGATATCT<br>CTTCGCAGAATTAGGTA |
| <b>eIF2<math>\beta</math>-<br/>E189R/Q193R<br/>REV</b> | TACCTAATTCTGCGAAGAGATATCGAATCAAATGTCTCGGAG<br>ATCTATGCAATTTTTTCG |

\*FOR, forward primer ; REV, reverse primer



## REFERENCES FOR SUPPLEMENTAL MATERIAL

1. Gietz RD & Sugino A (1988) New yeast-Escherichia coli shuttle vectors constructed with in vitro mutagenized yeast genes lacking six-base pair restriction sites. *Gene* 74(2):527-534.
2. Yoon HJ & Donahue TF (1992) The suil suppressor locus in *Saccharomyces cerevisiae* encodes a translation factor that functions during tRNA(iMet) recognition of the start codon. *Mol Cell Biol* 12(1):248-260.
3. Martin-Marcos P, Cheung YN, & Hinnebusch AG (2011) Functional elements in initiation factors 1, 1A, and 2beta discriminate against poor AUG context and non-AUG start codons. *Mol Cell Biol* 31(23):4814-4831.
4. Parent SA, Fenimore CM, & Bostian KA (1985) Vector systems for the expression, analysis and cloning of DNA sequences in *S. cerevisiae*. *Yeast* 1(2):83-138.
5. Donahue TF & Cigan AM (1988) Genetic selection for mutations that reduce or abolish ribosomal recognition of the HIS4 translational initiator region. *Mol Cell Biol* 8(7):2955-2963.
6. Hinnebusch AG (1985) A hierarchy of trans-acting factors modulates translation of an activator of amino acid biosynthetic genes in *Saccharomyces cerevisiae*. *Mol Cell Biol* 5(9):2349-2360.
7. Visweswaraiah J, Pittman Y, Dever TE, & Hinnebusch AG (2015) The beta-hairpin of 40S exit channel protein Rps5/uS7 promotes efficient and accurate translation initiation in vivo. *Elife* 4:e07939.
8. Asano K, Krishnamoorthy T, Phan L, Pavitt GD, & Hinnebusch AG (1999) Conserved bipartite motifs in yeast eIF5 and eIF2Bepsilon, GTPase-activating and GDP-GTP exchange factors in translation initiation, mediate binding to their common substrate eIF2. *EMBO J* 18(6):1673-1688.
9. Valasek L, Nielsen KH, Zhang F, Fekete CA, & Hinnebusch AG (2004) Interactions of eukaryotic translation initiation factor 3 (eIF3) subunit NIP1/c with eIF1 and eIF5 promote preinitiation complex assembly and regulate start codon selection. *Mol Cell Biol* 24(21):9437-9455.
10. Acker MG, Kolitz SE, Mitchell SF, Nanda JS, & Lorsch JR (2007) Reconstitution of yeast translation initiation. *Methods Enzymol* 430:111-145.
11. Martin-Marcos P, *et al.* (2013) beta-Hairpin loop of eukaryotic initiation factor 1 (eIF1) mediates 40 S ribosome binding to regulate initiator tRNA(Met) recruitment and accuracy of AUG selection in vivo. *J Biol Chem* 288(38):27546-27562.
12. Dever TE, Yang W, Astrom S, Bystrom AS, & Hinnebusch AG (1995) Modulation of tRNA(iMet), eIF-2, and eIF-2B expression shows that GCN4 translation is inversely coupled to the level of eIF-2.GTP.Met-tRNA(iMet) ternary complexes. *Mol Cell Biol* 15(11):6351-6363.
13. Pavitt GD, Ramaiah KV, Kimball SR, & Hinnebusch AG (1998) eIF2 independently binds two distinct eIF2B subcomplexes that catalyze and regulate guanine-nucleotide exchange. *Genes Dev* 12(4):514-526.
14. Gomez E, Mohammad SS, & Pavitt GD (2002) Characterization of the minimal catalytic domain within eIF2B: the guanine-nucleotide exchange factor for translation initiation. *EMBO J* 21(19):5292-5301.

15. Cheung YN, *et al.* (2007) Dissociation of eIF1 from the 40S ribosomal subunit is a key step in start codon selection in vivo. *Genes Dev* 21(10):1217-1230.
16. Martin-Marcos P, *et al.* (2014) Enhanced eIF1 binding to the 40S ribosome impedes conformational rearrangements of the preinitiation complex and elevates initiation accuracy. *RNA* 20(2):150-167.

Fig. S1

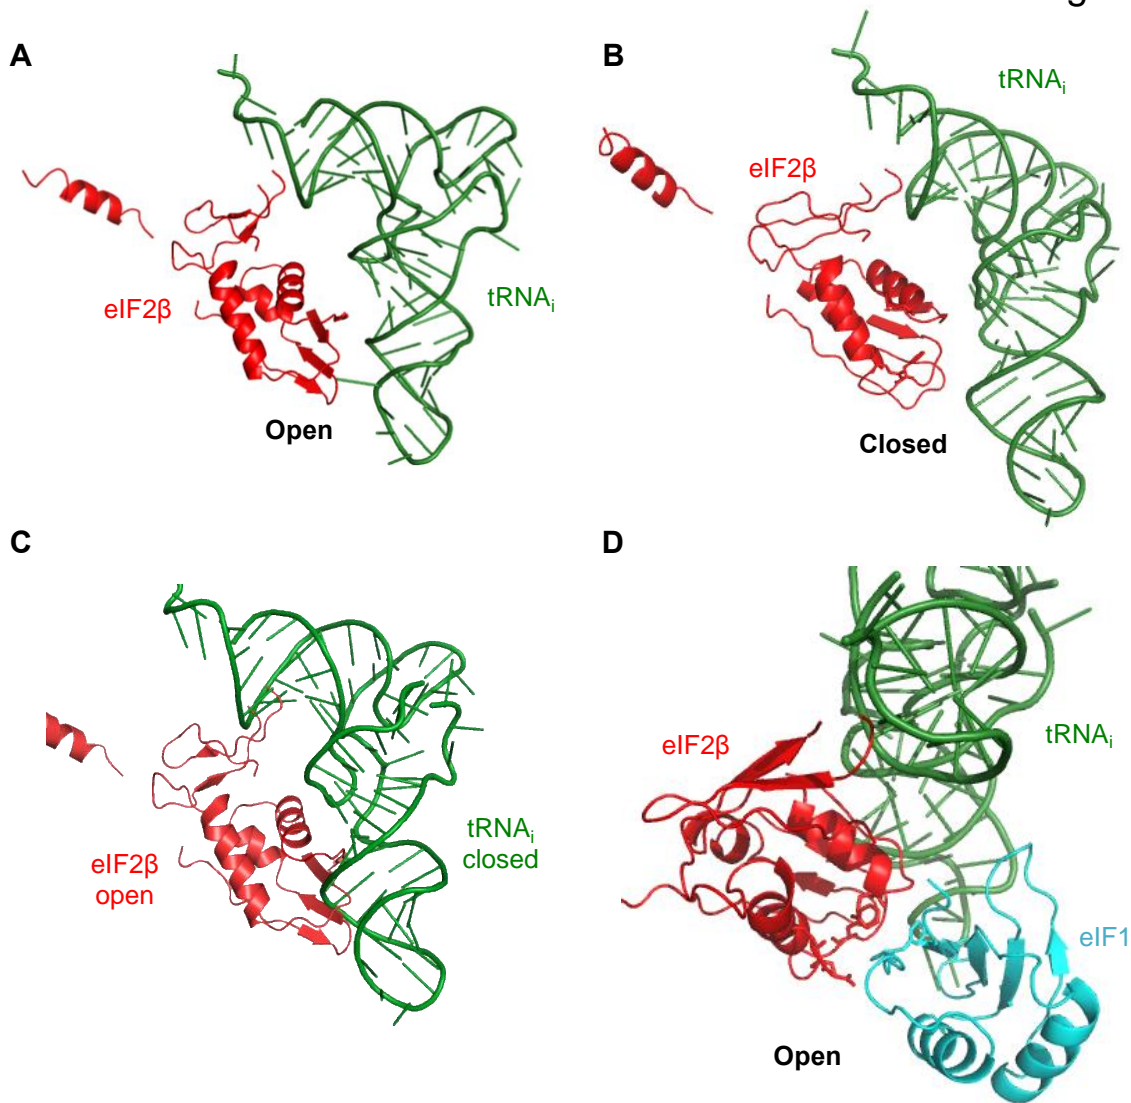

**Fig. S1. Distinct interactions of eIF2 $\beta$  with tRNA<sub>i</sub> in py48S-open versus py48S-closed should enable eIF2 $\beta$  to restrict transition to the closed/P<sub>IN</sub> conformation of the PIC in a manner facilitated by eIF1. (A)** Interactions between eIF2 $\beta$  and the tRNA<sub>i</sub> ASL and D-loop in the py48S-open complex. **(B)** Interactions of eIF2 $\beta$  with tRNA<sub>i</sub> in py48S-closed differ from those in (A) and are restricted to the D-loop. **(C)** An overlay of eIF2 $\beta$  in py48S-open with tRNA<sub>i</sub> in py48S-closed reveals predicted clashes throughout the ASL. These clashes are alleviated during the open-to-closed transition by movement of eIF2 $\beta$  both laterally and toward the D-loop. The predicted clashes suggest that eIF2 $\beta$  performs a steric role in ensuring accurate start codon selection, undergoing a conformational change that allows tRNA<sub>i</sub> to assume the P<sub>IN</sub> state of the closed conformation only when a perfect AUG:anticodon duplex is formed in the P-site. **(D)** A network of interactions between eIF2 $\beta$  and both eIF1 and tRNA<sub>i</sub> in py48S-open enhances TC recruitment and stabilizes the open, scanning conformation of the PIC prior to AUG selection.

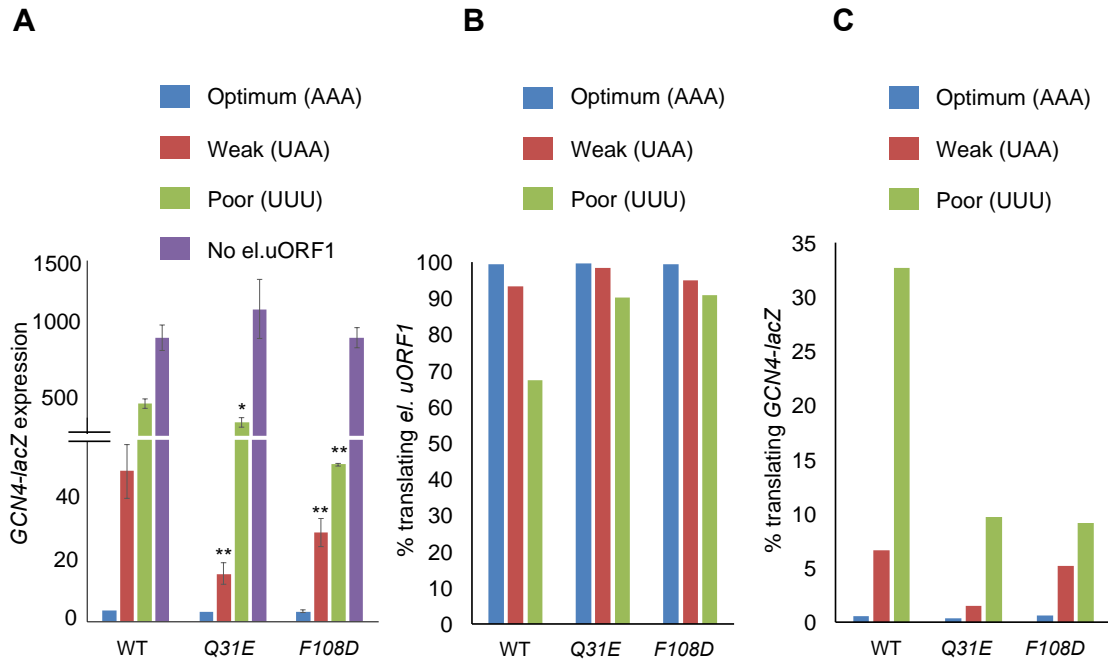

**Fig. S2. eIF1 substitutions Q31E and F108D decrease discrimination against the *GCN4* uORF1 AUG codon in suboptimal context.** (A) Transformants of JCY03 harboring WT *SUI1*, *sui1-Q31E* or *sui1-F108D* and el.uORF1 *GCN4-lacZ* reporters (pC3502, pC3503 or pC4466) containing, respectively, optimum, weak or poor context of uAUG-1, or an uORF-less *GCN4-lacZ* reporter with a mutated uAUG-1 (pC3505), were assayed for  $\beta$ -galactosidase activities as in Fig. 2D. Mean expression values with SEMs were determined from six transformants and asterisks indicate significant differences between mutant and WT as judged by a two-tailed, unpaired Student's t test (\* $P < 0.05$ ; \*\* $P < 0.01$ ). (B, C) The percentages of scanning ribosomes that translate el.uORF1 (B) or leaky-scan uAUG-1 and translate *GCN4-lacZ* (C) were calculated from the data in (A) by comparing the amount of *GCN4-lacZ* expression observed for each uORF-containing reporter to the uORF-less construct, yielding the percentages in (C), and subtracting the values in (C) from 100 to obtain the percentages in (B).

Fig. S3

**A**

|                                                           | GCN4-lacZ expression(U) |             |              | % translating GCN4-lacZ |             |              | % translating <i>el. uORF1</i> |             |              |
|-----------------------------------------------------------|-------------------------|-------------|--------------|-------------------------|-------------|--------------|--------------------------------|-------------|--------------|
|                                                           | (1)<br>WT               | (2)<br>Q31A | (3)<br>F108A | (4)<br>WT               | (5)<br>Q31A | (6)<br>F108A | (7)<br>WT                      | (8)<br>Q31A | (9)<br>F108A |
| (1) Optimum: <b>AAA AUG AUG</b>                           | 5±0.7                   | 2±0.6**     | 3±0.2*       | 0.5                     | 0.2         | 0.3          | 99.5                           | 99.8        | 99.7         |
| (2) Weak : <b>UAA AUG</b>                                 | 66±11                   | 17±2**      | 8±5**        | 8                       | 2           | 1            | 92                             | 98          | 99           |
| (3) Poor : <b>UUUAUG</b>                                  | 327±43                  | 80±7**      | 158±15**     | 33                      | 9           | 16           | 67                             | 91          | 84           |
| (4) No <i>el. uORF1</i> : <b>AAA AGC</b> GCN4-lacZ<br>AUG | 1000±150                | 900±200     | 1000±100     | >99                     | >99         | >99          | <1                             | <1          | <1           |

**B**

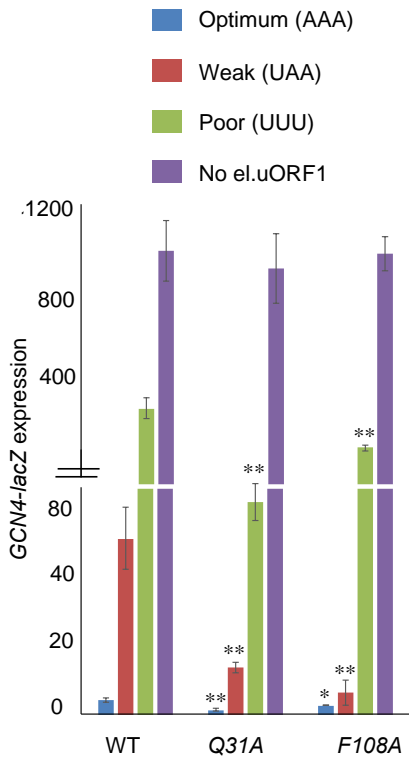

**C**

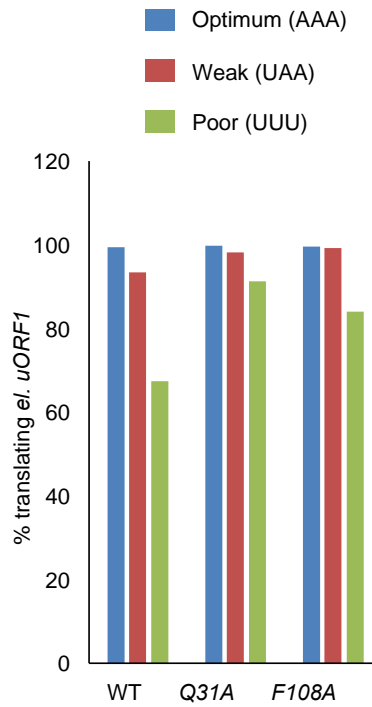

**D**

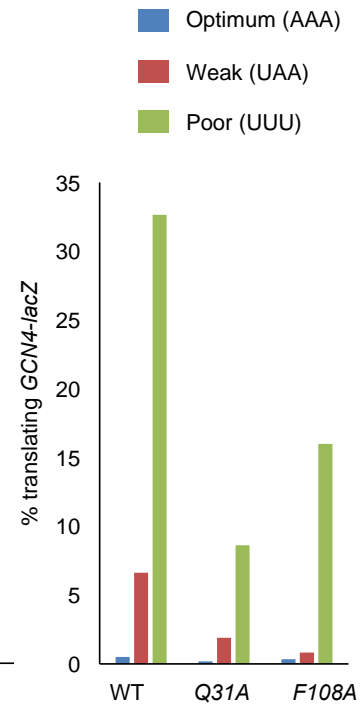

**Fig. S3. eIF1 substitutions Q31A and F108A decrease discrimination against the *GCN4* uORF1 AUG codon in suboptimal context.** (A) Transformants of JCY03 harboring WT *SUI1*, *sui1-Q31A* and *eIF1-F108A* and the el. uORF1 *GCN4-lacZ* reporters containing optimum (row 1), weak (row 2) or poor (row 3) context of uAUG-1, or an uORF-less *GCN4-lacZ* reporter with a mutated uAUG-1 (row 4), were analyzed as in Fig. 3C. (B) b-galactosidase activities from columns 1-3 of (A) plotted in graphical format for WT *SUI1*, *sui1-Q31A* or *sui1-F108A* transformants containing the el. uORF1 *GCN4-lacZ* reporters with optimum, weak or poor context of uAUG-1, or an uORF-less *GCN4-lacZ* reporter with a mutated uAUG. Mean expression values with SEMs were determined from six transformants and asterisks indicate significant differences between mutant and WT as judged by a two-tailed, unpaired Student's t test (\*P < 0.05; \*\*P < 0.01). (C, D) The percentages of scanning ribosomes that translate el.uORF1 (C) or leaky-scan uAUG-1 and translate *GCN4-lacZ* (D) were calculated from the data in (B) as described in Fig. S2B-C.

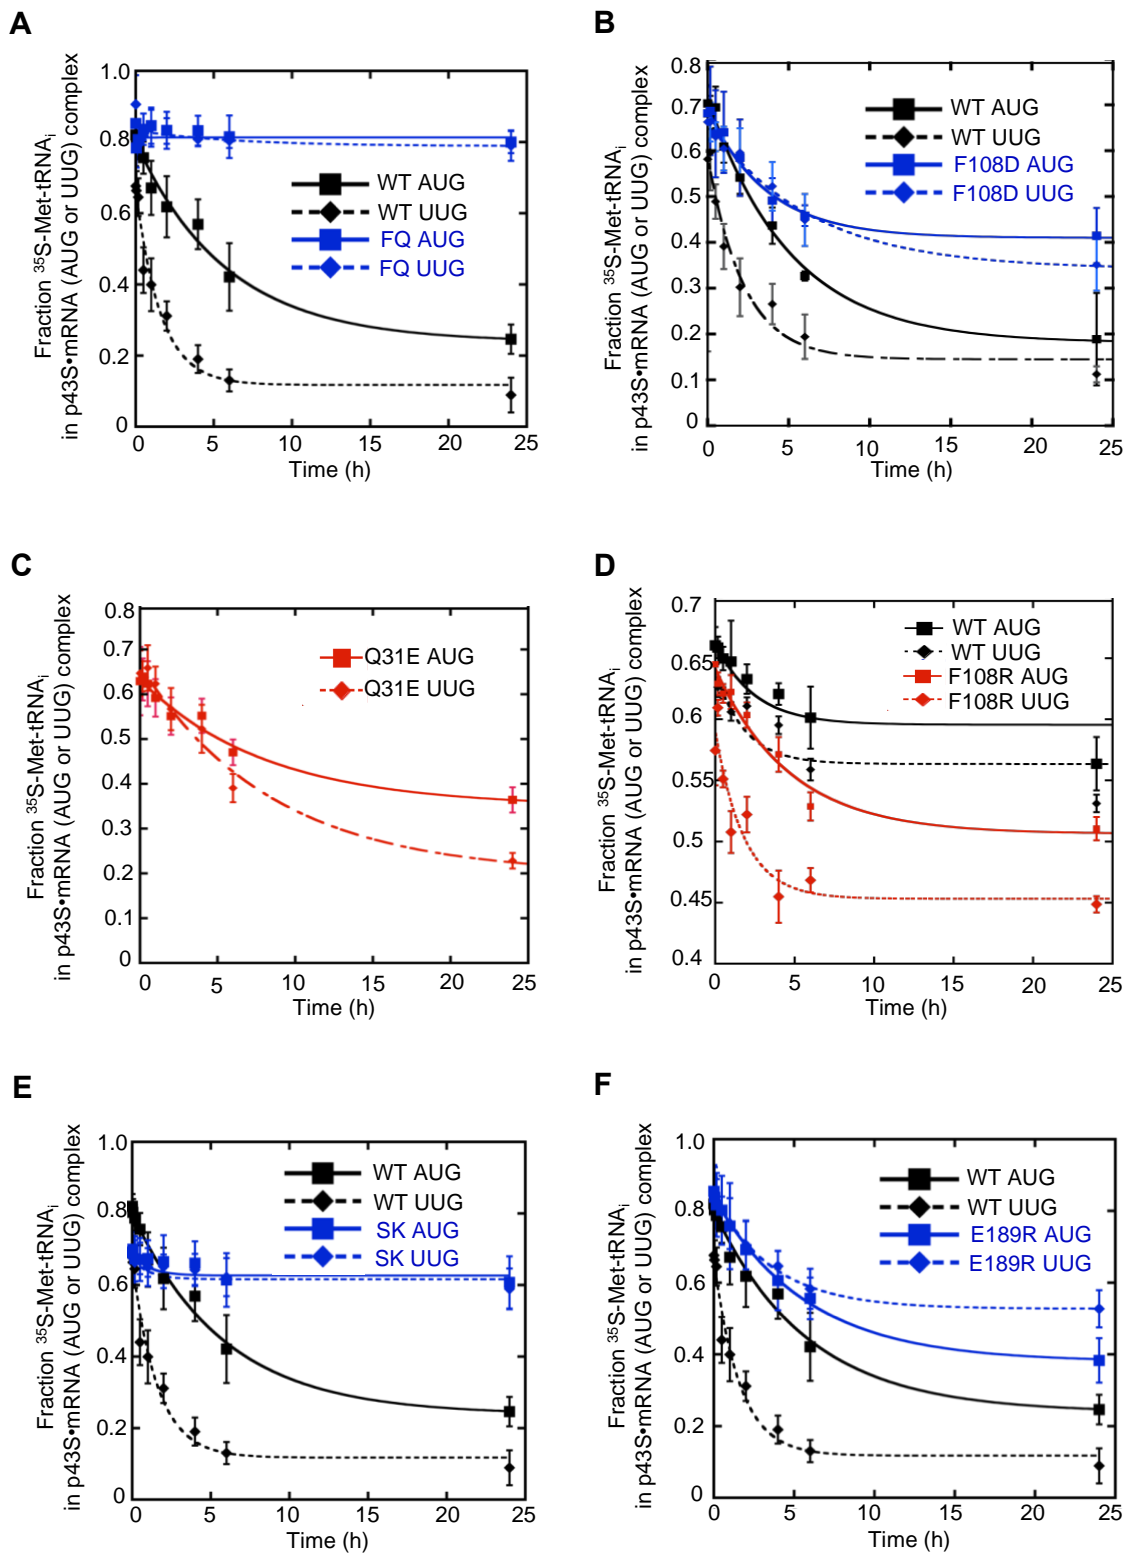

**Fig. S4. Plots of TC dissociation assays with error. (A-E)** To measure TC dissociation kinetics, as summarized schematically in Fig. 5D, partial 48S complexes were assembled with eIF1A, model mRNA containing an AUG or UUG start codon, radiolabeled TC containing either WT or mutant eIF2b, and either WT or mutant eIF1. Following incubation at 26° C for two hours, each reaction was chased with excess unlabeled TC for increasing periods of time and the fraction of labeled Met-tRNA<sub>i</sub> bound to the PIC at each time-point was determined via EMSA. Data from each gel were plotted individually to determine a dissociation rate ( $k_{off}$ ). Representative plots are shown in Figs. 5E, 5H, 7C, 8G, and 9E. The rates from three independent experiments were averaged to determine the  $k_{off}$  values shown in Figs. 5F, 5I, 7D, 8H, and 9F. In order to give a visual representation of the variability across gels, we have averaged together values at each time point across three independent experiments and plotted an average curve with SEMs for eIF2b-F217A/Q221A (A), eIF1-F108D (B), eIF1-Q31E (C), eIF1-F108R (D), eIF2b-S202A/K214A (E), and eIF2b-E189R (F).



**A**

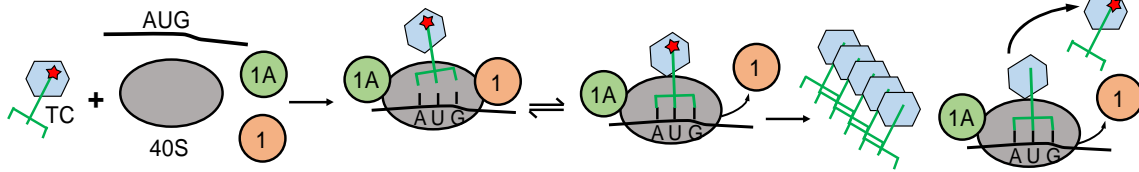

**B**

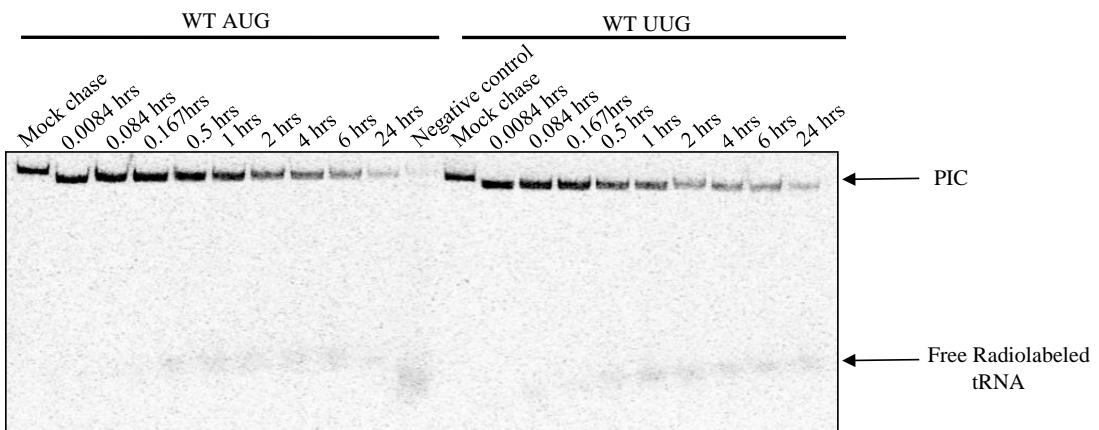

**C**

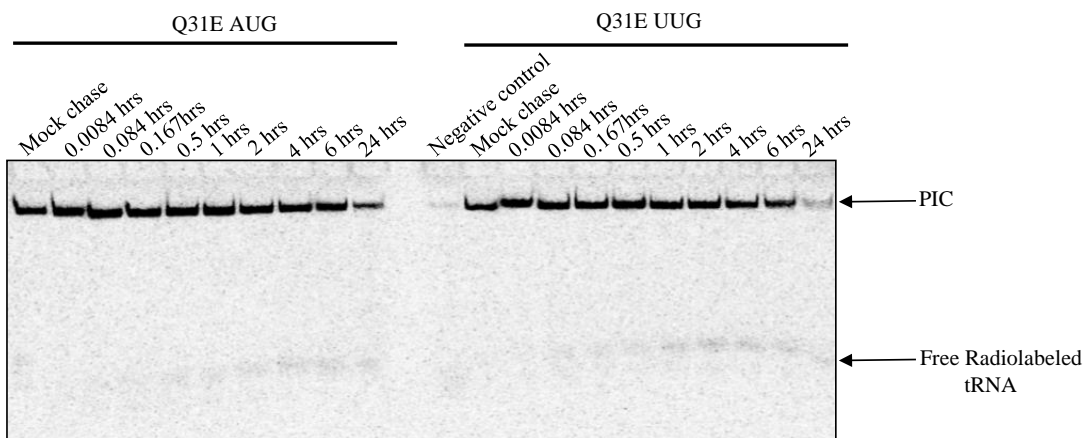

**Fig. S5. Representative results from TC dissociation assays.** (A-C) To measure TC dissociation kinetics, as summarized schematically in (A), partial 48S complexes were assembled with radiolabeled TC, eIF1A, model mRNA containing an AUG or UUG start codon, and either WT eIF1 (B) or eIF1-Q31E (C). Following incubation at 26° C for two hours, each reaction was chased with excess unlabeled TC for increasing periods of time (between 0.0084 and 24 hours as indicated above gel image) and the fraction of labeled Met-tRNA<sub>i</sub> bound to the PIC at each time-point was determined by resolving radiolabeled 48S complexes (upper band) from free radiolabeled tRNA<sub>i</sub> (lower band) by EMSA. As a control, one reaction was chased with buffer only ('mock chase') for each eIF1/mRNA pair, representing the maximum possible PIC-bound radioactivity. One reaction was also conducted in which unlabeled chase was added before labeled TC ('negative control'), demonstrating the least possible PIC-bound radioactivity. The upper band from each lane was quantified and normalized to total radioactivity in the lane (after background subtraction). These values for each time point were normalized to the negative control and plotted as shown in Fig. 5H.

Fig. S6

A

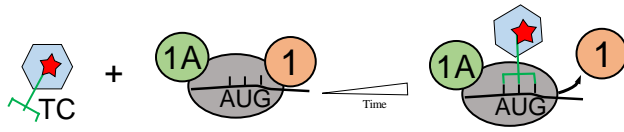

B

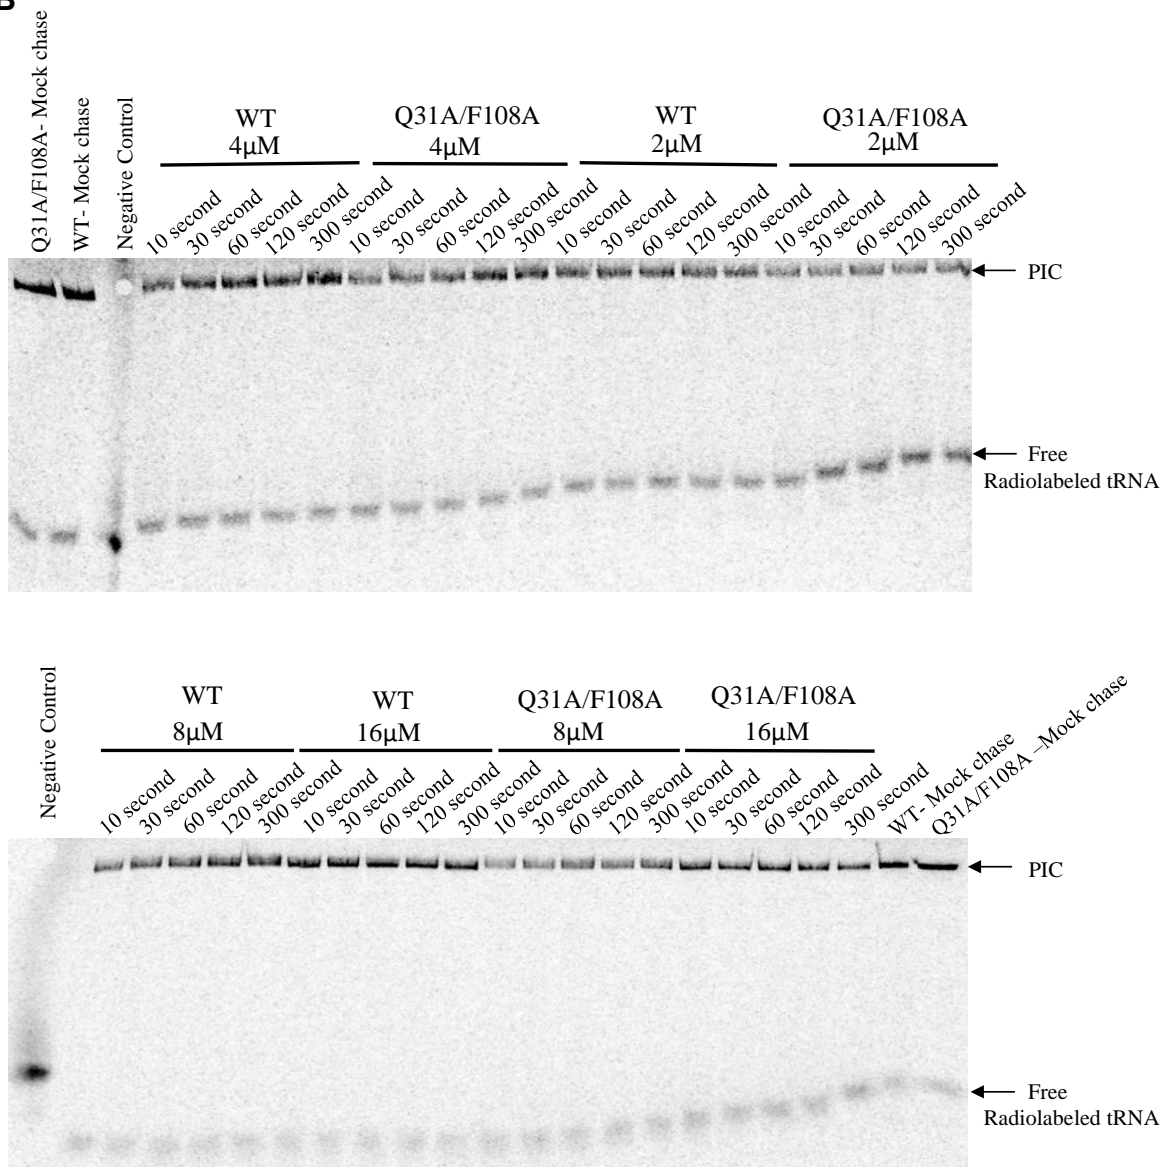

**Fig. S6. Representative results from TC association assays. (A, B)** To measure TC association kinetics, as summarized schematically in (A), radiolabeled TC was mixed with pre-formed 40S·eIF1A·eIF1·mRNA complexes containing either WT eIF1 or eIF1-Q31A/F108A and incubated for increasing times (as indicated). Reactions for WT and mutant eIF1 were carried out at each of four concentrations of 40S ribosomal subunits (2  $\mu$ M, 4  $\mu$ M, 8  $\mu$ M, and 16  $\mu$ M, as shown). Reactions were terminated with a chase of excess unlabeled TC. The fraction of labeled Met-tRNA<sub>i</sub> bound to the PIC at each time-point was determined by EMSA, as in Fig. S5. As a control, one reaction was chased with buffer only ('mock chase'), representing the maximum possible PIC-bound radioactivity. One reaction was also carried out in which unlabeled chase was added before labeled TC ('negative control'), demonstrating the least possible PIC-bound radioactivity. For each time point, the upper band was quantified and normalized to total radioactivity in the lane (after background subtraction), followed by normalization to the negative control. These values were plotted to obtain the pseudo-first-order rate constant ( $k_{\text{obs}}$ ) at each 40S concentration. The resulting  $k_{\text{obs}}$  values were plotted versus 40S concentration, as in Fig. 6B, to obtain the second-order rate constant ( $k_{\text{on}}$ ).

Fig. S7

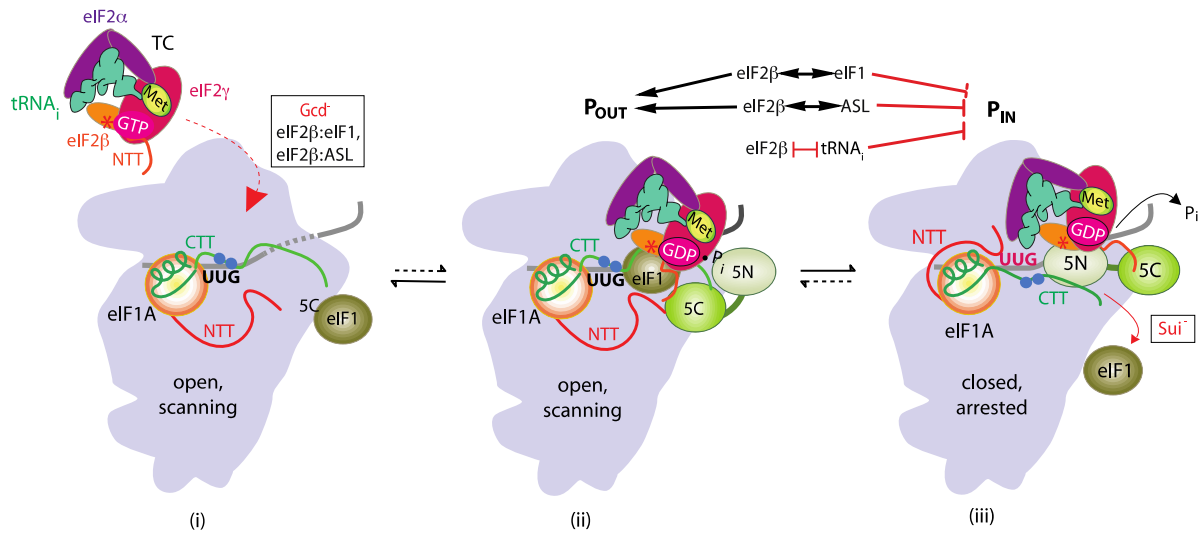

**Fig. S7. Model describing the effects of eIF2 $\beta$  interactions on the conformational rearrangements of the PIC during start codon selection.** As described in Fig. 1A, eIF1 and eIF1A promote an open, scanning conformation of the PIC to which TC loads (i). Mutations that destabilize the open conformation slow TC loading, resulting in a Gcd<sup>-</sup> phenotype. Following TC binding, the PIC scans the mRNA leader in the open conformation (ii). When a start codon is recognized, the PIC transitions to the closed state, accompanied by release of eIF1 and P<sub>i</sub> (iii). Mutations that favor the closed complex, either by destabilizing the open state or by removing an impediment to transition to the closed state, decrease the fidelity of initiation, allowing selection of non-AUG codons including the near cognate UUG. Such mutations confer a Sui<sup>-</sup> phenotype. (Above) The arrows summarize the contributions of eIF2 $\beta$  to ensuring accurate start codon selection indicated by our findings here. The interactions of eIF2 $\beta$  with eIF1 and the ASL of tRNA<sub>i</sub> (Fig. S1D) stabilize and promote the open state, either by anchoring eIF1 to the complex or by stabilizing tRNA<sub>i</sub> binding, while impeding transition to the closed state. For this reason, substitutions at these interfaces confer both Gcd<sup>-</sup> and Sui<sup>-</sup> phenotypes. The clash of open-state eIF2 $\beta$  with the closed-state tRNA<sub>i</sub> D-loop (Fig. S1C), however, enforces a strict requirement for an AUG start codon and inhibits transition to the closed state in its absence, but does not stabilize the open state. Thus, substitutions at this interface produce Sui<sup>-</sup> phenotypes without any accompanying Gcd<sup>-</sup> phenotype.
